# Supplementary material
Source: PubMed Central journal article supplement (PMC4135427)
Supplement: NIHMS611164-supplement-Supplement.pdf [file NIHMS611164-supplement-Supplement.pdf]

**Table S1. Hantaviruses and their host associations, including human cases.**

## Rodentia: Muridae: Murinae

| Virus Name  | ID/Strain              | Host Scientific                | S        | M        | L        | Country       | Date |
|-------------|------------------------|--------------------------------|----------|----------|----------|---------------|------|
| Amur        | AMRV/Khek/AP209        | <i>Apodemus peninsulae</i>     | AB620028 | AB620029 | AB620030 | Russia        | 2005 |
| Da Bie Shan | DBSV/NC167             | <i>Niviventer confucianus</i>  | AB027523 | AB027115 | DQ989237 | China         | 1980 |
| Dobrava     | DOBV/08-118            | <i>Apodemus agrarius</i>       | GQ205407 | GQ205412 |          | Germany       | 2008 |
| Dobrava     | DOBV/SK/Aa             | <i>Apodemus agrarius</i>       | AY961615 | AY961616 | GU904039 | Slovakia      | 2009 |
| Dobrava     | DOBV/400Af/98          | <i>Apodemus flavicollis</i>    | AY168576 | AY168577 |          | Slovakia      |      |
| Dobrava     | DOBV/AP99              | <i>Apodemus flavicollis</i>    | NC005233 | NC005234 | NC005235 | Greece        | 1999 |
| Hantaan     | HTNV/76-118            | <i>Apodemus agrarius</i>       | NC005218 | NC005219 | NC005222 | Korea         | 1976 |
| Hantaan     | HTNV/Galk/AA57/2002    | <i>Apodemus agrarius</i>       | AB620031 | AB620032 | AB620033 | Russia        | 2002 |
| Saaremaa    | SAAV/Aa1403            | <i>Apodemus agrarius</i>       | AJ616854 | AJ616855 |          | Denmark       | 2000 |
| Saaremaa    | SAAV/160V              | <i>Apodemus agrarius</i>       | AJ009773 | AJ009774 | AJ410618 | Estonia       | 1996 |
| Sangassou   | SANV/SA14              | <i>Hylomyscus simus</i>        | JQ082300 | JQ082301 | JQ082302 | Guinea        | 2004 |
| Sangassou   | SANV/SA22              | <i>Hylomyscus simus</i>        | JQ082303 | JQ082304 | JQ082305 | Guinea        | 2004 |
| Seoul       | SEOV/L99               | <i>Rattus losea</i>            | AF288299 | AF288298 | AF288297 | China         |      |
| Seoul       | SEOV/80-39             | <i>Rattus norvegicus</i>       | NC005236 | NC005237 | NC005238 | Korea         | 1980 |
| Seoul       | SEOV/TCH               | <i>Rattus norvegicus</i>       | AF329389 | U00473   |          | United States | 1981 |
| Seoul       | SEOV/WuhanRn85         | <i>Rattus norvegicus</i>       | FJ884380 | FJ884488 |          | China         | 2008 |
| Seoul       | SEOV/CGRn9415          | <i>Rattus norvegicus</i>       | EF990902 | EF990916 | EF990930 | China         | 2001 |
| Seoul       | SEOV/NYA039            | <i>Rattus norvegicus</i>       | EF210131 |          |          | China         |      |
| Seoul       | SEOV/YongjiaRn14       | <i>Rattus norvegicus</i>       | GU592947 | GU592927 |          | China         |      |
| Seoul       | SEOV/SR-11             | <i>Rattus norvegicus</i>       | M34881   | M34882   |          | Japan         | 1982 |
| Seoul       | SEOV/Guo3              | <i>Rattus rattus</i>           | AB027522 | AB027521 |          | China         |      |
| Soochong    | SOOV/SC1               | <i>Apodemus peninsulae</i>     | AY675349 | AY675353 | DQ056292 | Korea         | 1997 |
| Thailand    | THAIV/NR_Bi0024        | <i>Bandicota indica</i>        | AM397666 | AM397671 |          | Thailand      | 2004 |
| Thailand    | THAIV/R6107            | <i>Bandicota indica</i>        |          |          | JN116258 | Thailand      | 2010 |
| Thailand    | THAIV/749              | <i>Bandicota indica</i>        |          | L08756   |          | Thailand      | 1984 |
| Thailand    | THAIV/741              | <i>Bandicota indica</i>        | AB186420 |          |          | Thailand      | 1995 |
| Thailand    | THAIV/Serang/Rt60      | <i>Rattus tanezumi</i>         | AM998808 | AM998807 | AM998806 | Indonesia     | 2000 |
| Thailand    | THAIV/JurongTJK/06RT49 | <i>Rattus tanezumi</i>         | GQ274940 | GQ274938 | GQ274936 | Singapore     | 2006 |
| Tigray      | TIGV/90                | <i>Stenocephalemys albipes</i> |          |          | JQ956487 | Ethiopia      | 2010 |

## Rodentia: Cricetidae: Arvicolinae

| Virus Name     | ID/Strain            | Host Scientific              | S        | M        | L        | Country       | Date |
|----------------|----------------------|------------------------------|----------|----------|----------|---------------|------|
| Bloodland Lake | BLLV/MO46            | <i>Microtus ochrogaster</i>  | U19303   | U19305   |          | United States | 1994 |
| Hokkaido       | HOKV/Kamiiso-8Cr-95  | <i>Myodes rufocanus</i>      | AB010730 |          |          | Japan         | 1995 |
| Hokkaido       | HOKV/Tobetsu-60Cr-93 | <i>Myodes rufocanus</i>      | AB010731 |          |          | Japan         | 1995 |
| Isla Vista     | ISLAV/MC47           | <i>Microtus californicus</i> | U19302   | U19304   |          | United States | 1994 |
| Khabarovsk     | KHAV/MF-43           | <i>Microtus fortis</i>       | U35255   | AJ011648 | AJ011650 | Russia        | 1989 |

|               |                      |                                     |          |          |          |                |      |
|---------------|----------------------|-------------------------------------|----------|----------|----------|----------------|------|
| Khabarovsk    | KHAV/MF679           | <i>Microtus maximowiczii</i>        | EU360900 | EU360908 | EU360904 | Russia         | 2002 |
| Khabarovsk    | KHAV/Yakeshi-Mm-59   | <i>Microtus maximowiczii</i>        | EU072483 | EU072489 |          | China          | 2004 |
| Luxi          | LXV/309              | <i>Eothenomys miletus</i>           | HM756286 | HM756287 | HQ404253 | China          | 2009 |
| Muju          | MUJV/99-28           | <i>Myodes regulus</i>               | DQ138142 | DQ138141 |          | Korea          | 1999 |
| Muju          | MUJV/00-18           | <i>Myodes regulus</i>               | DQ138128 | DQ138127 |          | Korea          | 2000 |
| Muju          | MUJV/04-4            | <i>Myodes regulus</i>               | DQ138129 | EF198413 |          | Korea          | 2004 |
| Prospect Hill | PHV/PH-1             | <i>Microtus pennsylvanicus</i>      | X55128   | X55129   | EF646763 | United States  | 1982 |
| Puumala       | PUUV/Fusong-Cr-247   | <i>Myodes rufocanus</i>             | EF442087 |          |          | China          | 2002 |
| Puumala       | PUUV/Fusong-Cr-275   | <i>Myodes rufocanus</i>             | EF442091 |          |          | China          | 2002 |
| Puumala       | PUUV/Sotkamo         | <i>Myodes glareolus</i>             | NC005224 | NC005223 | NC005225 | Finland        | 1983 |
| Puumala       | PUUV/DTK/Ufa-97      | <i>Myodes glareolus</i>             | AB297665 | AB297666 | AB297667 | Russia         | 1997 |
| Puumala       | PUUV/Samara-49/CG    | <i>Myodes glareolus</i>             | AB433842 | AB433850 |          | Russia         | 2005 |
| Tatenale      | TATV/B41             | <i>Microtus agrestis</i>            | JX316009 |          | JX316008 | United Kingdom | 2011 |
| Topografov    | TOPV/Ls136V          | <i>Lemmus sibiricus</i>             | AJ011646 | AJ011647 | AJ011649 | Russia         | 1994 |
| Tula          | TULV/Mag30-02-Ebe    | <i>Microtus agrestis</i>            | DQ662090 | DQ665814 |          | Germany        | 2002 |
| Tula          | TULV/Mar205-05-Sen   | <i>Microtus arvalis</i>             | EU439951 | EU439962 |          | Germany        | 2005 |
| Tula          | TULV/5302v           | <i>Microtus arvalis</i>             | NC005227 | NC005228 | NC005226 | Moravia        | 1994 |
| Tula          | TULV/249Mr           | <i>Microtus rossiaemeridionalis</i> | Z30944   |          |          | Russia         | 1987 |
| Vladivostok   | VLAV/Fusong-Mf-682   | <i>Microtus fortis</i>              | EU072480 | EU072488 | FJ170807 | China          | 2002 |
| Vladivostok   | VLAV/Fusong-Mf-731   | <i>Microtus fortis</i>              | EU072481 |          |          | China          | 2002 |
| Vladivostok   | VLAV/1Mf95           | <i>Microtus fortis</i>              | AB011630 |          |          | Russia         | 1995 |
| Vladivostok   | VLAV/Shenyang-Mf-135 | <i>Microtus fortis</i>              | FJ170797 | FJ170805 | FJ170809 | China          | 2002 |
| Yuanjiang     | YUJV/Yuanjiang-Mf-78 | <i>Microtus fortis</i>              | FJ170792 |          | FJ170811 | China          | 2007 |
| Yuanjiang     | YUJV/Yuanjiang-Mf-13 | <i>Microtus fortis</i>              | FJ170795 |          |          | China          | 2007 |
| Yuanjiang     | YUJV/Yuanjiang-Mf-15 | <i>Microtus fortis</i>              | FJ170794 | FJ170800 | FJ170812 | China          | 2002 |

Rodentia: Cricetidae: Neotominae

| Virus Name       | ID/Strain         | Host Scientific                    | S        | M        | L        | Country       | Date |
|------------------|-------------------|------------------------------------|----------|----------|----------|---------------|------|
| Bloodland Lake   | BLLV/PL27         | <i>Peromyscus leucopus</i>         | U19301   |          |          | United States |      |
| Blue River       | BLRV/Indiana      | <i>Peromyscus leucopus</i>         |          | AF030551 |          | United States |      |
| El Moro Canyon   | ELMCV/Huit        | <i>Reithrodontomys megalotis</i>   | AB620106 | AB620107 | AB620108 | Mexico        | 2006 |
| El Moro Canyon   | ELMCV/RM-97       | <i>Reithrodontomys megalotis</i>   | U11427   | U26828   |          | United States |      |
| El Moro Canyon   | ELMCV/Carr        | <i>Reithrodontomys sumichrasti</i> | AB620103 | AB620104 | AB620105 | Mexico        | 2006 |
| Limestone Canyon | LSCV/68273        | <i>Peromyscus boylii</i>           | AF307322 | AF307323 |          | United States | 1995 |
| Montano          | MTNV/104          | <i>Peromyscus beatae</i>           | AB620100 | AB620101 | AB620102 | Mexico        | 2006 |
| New York         | NYV/NY-1          | <i>Peromyscus leucopus</i>         |          | U36802   |          | United States | 1994 |
| New York         | NYV/Monongahela-1 | <i>Peromyscus maniculatus</i>      | U32591   | U32651   |          | United States | 1985 |
| Rio Segundo      | RIOSV/RMx-Costa-1 | <i>Reithrodontomys mexicanus</i>   | U18100   |          |          | Costa Rica    | 1989 |
| Sin Nombre       | SNV/CC107         | <i>Peromyscus maniculatus</i>      | L33683   | L33474   |          | United States | 1993 |
| Sin Nombre       | SNV/NM-R11        | <i>Peromyscus maniculatus</i>      | L37904   | L37903   | L37902   | United States | 1993 |
| Sin Nombre       | SNV/RMMex-1       | <i>Reithrodontomys megalotis</i>   | U18098   |          |          | Mexico        | 1982 |

## Rodentia: Cricetidae: Sigmodontinae

| Virus Name        | ID/Strain         | Host Scientific                   | S        | M        | L        | Country       | Date |
|-------------------|-------------------|-----------------------------------|----------|----------|----------|---------------|------|
| Aim Ape Itapua    | AAIV/IP16         | <i>Akodon montensis</i>           | DQ345764 | AY515599 |          | Paraguay      |      |
| Alto Paraguay     | ATLV/TK62276      | <i>Holochilus chacarius</i>       |          | AY515597 |          | Paraguay      |      |
| Anajatuba         | ANAV/Of58         | <i>Oligoryzomys fornesi</i>       | DQ451829 |          |          | Brazil        |      |
| Andes             | ANDV/9717869      | <i>Oligoryzomys longicaudatus</i> | NC003466 | NC003467 | NC003468 | Chile         | 1997 |
| Andes             | ANDV/Maciél       | <i>Necromys benefactus</i>        | AF482716 |          |          | Argentina     | 1997 |
| Araucaria         | ARAUV/10104       | <i>Oligoryzomys nigripes</i>      | HQ337907 |          |          | Brazil        | 2007 |
| Araucaria         | ARAUV/10056       | <i>Oxymycterus judex</i>          | FJ409560 | FJ409557 |          | Brazil        | 2006 |
| Bermejo           | BMJV/Oc22531      | <i>Oligoryzomys chacoensis</i>    | AF482713 | AF028025 |          | Argentina     | 1997 |
| Bermejo           | BMJV/TK64399      | <i>Oligoryzomys chacoensis</i>    |          | AY515598 |          | Paraguay      |      |
| Black Creek Canal | BCCV              | <i>Sigmodon hispidus</i>          | L39949   | L39950   | L39951   | United States | 1993 |
| Bloodland Lake    | BLLV/SH29         | <i>Sigmodon hispidus</i>          | U19306   |          |          | United States |      |
| Cano Delgadito    | CADV/VHV-574      | <i>Sigmodon alstoni</i>           | DQ285566 | DQ284451 |          | Venezuela     |      |
| Catacamas         | CATV/C128001      | <i>Oryzomys couesi</i>            | DQ256126 | DQ177347 |          | Honduras      | 2001 |
| Choclo            | CHOV/MSB96073     | <i>Oligoryzomys fulvescens</i>    | DQ285046 | DQ285047 | EF397003 | Panama        | 2000 |
| Itapua            | ITPV/IP37_TK65937 | <i>Oligoryzomys nigripes</i>      | DQ345765 | AY515600 |          | Paraguay      |      |
| Itapua            | ITPV/IP38_TK65938 | <i>Oligoryzomys nigripes</i>      | DQ345766 | AY515601 |          | Paraguay      |      |
| Jabora            | JABV/Akm9635      | <i>Akodon montensis</i>           | JN232078 |          |          | Brazil        | 2006 |
| Jabora            | JABV/13651        | <i>Akodon montensis</i>           | JN252311 |          |          | Brazil        | 2010 |
| Jabora            | JABV/Akp8084      | <i>Akodon paranaensis</i>         | JN232080 |          |          | Brazil        | 2005 |
| Jabora            | JABV/12460        | <i>Akodon serrensis</i>           | HQ337904 |          |          | Brazil        | 2009 |
| Laguna Negra      | LANV/510B         | <i>Calomys laucha</i>             | AF005727 | AF005728 | AF005729 | Paraguay      | 1995 |
| Laguna Negra      | LANV/Cc192        | <i>Calomys callosus</i>           | NA       |          |          | Bolivia       | 2002 |
| Laguna Negra      | LANV/Cc94         | <i>Calomys callosus</i>           | NA       |          |          | Bolivia       | 2002 |
| Lechiguanas       | LECV/22819        | <i>Oligoryzomys flavescens</i>    | AF482714 | AF028022 |          | Argentina     | 1997 |
| Maporal           | MPRLV/HV97021050  | <i>Oligoryzomys fulvescens</i>    | AY267347 | AY363179 | EU788002 | Venezuela     | 1997 |
| Muleshoe          | MULV/SH-Tx-339    | <i>Sigmodon hispidus</i>          | U54575   |          |          | United States | 1995 |
| Oran              | ORNV/OI22996      | <i>Oligoryzomys longicaudatus</i> | AF482715 | AF028024 |          | Argentina     | 1997 |
| Pergamino         | PRGV/Aa14403      | <i>Akodon azarae</i>              | AF482717 | AF028028 |          | Argentina     | 1997 |
| Playa de Oro      | OROV/TK126521     | <i>Oryzomys couesi</i>            | EF534079 |          |          | Mexico        | 2004 |
| Rio Mamore        | RIOMV/HTN-007     | <i>Oligoryzomys microtis</i>      | FJ532244 | FJ608550 | FJ809772 | Peru          | 1996 |
| Rio Mamore        | RIOMV/OM-556      | <i>Oligoryzomys microtis</i>      | U52136   |          |          | Bolivia       | 1985 |

## Human cases

| Virus Name        | ID/Strain      | S        | M        | L        | Country       | Date |
|-------------------|----------------|----------|----------|----------|---------------|------|
| Andes             | ANDV/AH-1      | AF004660 |          |          | Argentina     | 1996 |
| Araraquara        | ARAV           | AF307325 | AF307327 |          | Brazil        | 1996 |
| Araucaria         | ARAUV/HPR02-72 | AY740625 | FJ409556 |          | Brazil        | 2002 |
| Bayou             | BAYV           | L36929   | L36930   |          | United States | 1994 |
| Castelo dos Sonho | CASV           | AF307324 | AF307326 |          | Brazil        | 1995 |
| Hantaan           | HV/Z37         | AF187082 | NC006436 | NC006438 | China         |      |

|              |                    |          |          |          |               |      |
|--------------|--------------------|----------|----------|----------|---------------|------|
| Hantaan      | HV/Z10             | NC006433 | NC006437 | NC006435 | China         |      |
| Hantaan      | HTNV/HOJV/ROK83-61 |          | D00376   |          | Korea         | 1983 |
| Laguna Negra | LANV/HMT-08-02     | FJ816031 |          |          | Brazil        | 2008 |
| New York     | NYV/RI-1           | U09488   | U36801   |          | United States | 1994 |
| Sin Nombre   | SNV/NMH10          | NC005216 | NC005215 | NC005217 | United States | 1993 |
| Sin Nombre   | SNV/3H226          | U02474   | U02471   |          | United States | 1993 |

Soricomorpha: Soricidae: Soricinae

| Virus Name    | ID/Strain          | Host Scientific              | S        | M        | L        | Country        | Date |
|---------------|--------------------|------------------------------|----------|----------|----------|----------------|------|
| Altai         | ALTAI              | <i>Sorex araneus</i>         |          |          | EU424341 | Russia         | 2007 |
| Artybash/Amga | ARTV/MGA/502       | <i>Sorex caecutiens</i>      |          | EU424340 | EU424339 | Russia         | 2007 |
| Artybash/Amga | ARTV/MGA/AH/301MKW | <i>Sorex caecutiens</i>      | KF974360 | KF974359 | KF974361 | Japan          | 2010 |
| Ash River     | ARRV/MSB73418      | <i>Sorex cinereus</i>        | EF650086 |          | EF619961 | United States  | 1994 |
| Asikkala      | ASIV/Durr1912Sm    | <i>Sorex minutus</i>         | KC880343 | KC880346 | KC880349 | Germany        | 2009 |
| Asikkala      | ASIV/Besk412Sm     | <i>Sorex minutus</i>         | KC880341 | KC880344 | KC880347 | Czech Republic | 2010 |
| Boginia       | BOGV/2074          | <i>Neomys fodiens</i>        |          | JX990966 | JX990965 | Poland         | 2011 |
| Camp Ripley   | RPLV/MSB47891      | <i>Blarina brevicauda</i>    | KF958463 |          |          | United States  | 1982 |
| Camp Ripley   | RPLV/MSB89863      | <i>Blarina brevicauda</i>    | FJ790772 | EF540774 | EF540771 | United States  | 1998 |
| Camp Ripley   | RPLV/MSB90845      | <i>Blarina brevicauda</i>    | KF958464 | EF540773 | KF958465 | United States  | 1998 |
| Camp Ripley   | RPLV/MSB89866      | <i>Blarina brevicauda</i>    |          | EF540775 | EF540772 | United States  | 1998 |
| Camp Ripley   | RPLV/MSB92437      | <i>Blarina brevicauda</i>    | KF958466 | KF958467 | KF958468 | United States  | 1999 |
| Cao Bang      | CBNV/3             | <i>Anourosorex squamipes</i> | EF543524 | EF543526 | EF543525 | Viet Nam       | 2006 |
| Jemez Springs | JMSV/Sb4638        | <i>Sorex bairdi</i>          | KF963282 |          | KF963283 | United States  | 2005 |
| Jemez Springs | JMSV/MSB90752      | <i>Sorex monticolus</i>      | FJ686859 |          |          | United States  | 1996 |
| Jemez Springs | JMSV/MSB90111      | <i>Sorex monticolus</i>      | FJ686860 |          |          | United States  | 1998 |
| Jemez Springs | JMSV/MSB99213      | <i>Sorex monticolus</i>      | FJ686861 |          |          | United States  | 2000 |
| Jemez Springs | JMSV/MSB58255      | <i>Sorex monticolus</i>      | FJ686865 |          |          | United States  | 2001 |
| Jemez Springs | JMSV/MSB144475     | <i>Sorex monticolus</i>      | FJ593499 | FJ593500 | FJ593501 | Canada         | 2005 |
| Jemez Springs | JMSV/MSB147533     | <i>Sorex monticolus</i>      | FJ686862 |          |          | Canada         | 2006 |
| Jemez Springs | JMSV/MSB147675     | <i>Sorex monticolus</i>      | FJ686863 |          |          | Canada         | 2006 |
| Jemez Springs | JMSV/MSB147745     | <i>Sorex monticolus</i>      | FJ686864 |          |          | Canada         | 2006 |
| Jemez Springs | JMSV/MSB89332      | <i>Sorex monticolus</i>      | EF619962 |          | EF619960 | United States  | 1996 |
| Jemez Springs | JMSV/FXC/MSB144181 | <i>Sorex palustris</i>       | KF963284 |          | KF963285 | United States  | 2005 |
| Jemez Springs | JMSV/PWB/Sv742     | <i>Sorex vagrans</i>         | KF963286 |          | KF963287 | United States  | 2003 |
| Kenkeme       | KKMV/MSB148794     | <i>Sorex roboratus</i>       | GQ306148 | GQ306149 | GQ306150 | Russia         | 2006 |
| Lianghe       | LHEV/As-1          | <i>Anourosorex squamipes</i> | JX465404 |          | JX465370 | China          | 2010 |
| Lianghe       | LHEV/As-216        | <i>Anourosorex squamipes</i> | JX465405 |          | JX465371 | China          | 2010 |
| Lianghe       | LHEV/As-217        | <i>Anourosorex squamipes</i> | JX465406 | JX465390 | JX465372 | China          | 2010 |
| Lianghe       | LHEV/As-220        | <i>Anourosorex squamipes</i> | JX465407 | JX465391 | JX465373 | China          | 2010 |
| Lianghe       | LHEV/As-221        | <i>Anourosorex squamipes</i> | JX465408 | JX465392 | JX465374 | China          | 2010 |
| Lianghe       | LHEV/As-222        | <i>Anourosorex squamipes</i> | JX465409 | JX465393 | JX465375 | China          | 2010 |

|              |                 |                               |          |          |          |             |      |
|--------------|-----------------|-------------------------------|----------|----------|----------|-------------|------|
| Lianghe      | LHEV/As-238     | <i>Anourosorex squamipes</i>  | JX465410 | JX465394 | JX465376 | China       | 2010 |
| Lianghe      | LHEV/As-255     | <i>Anourosorex squamipes</i>  | JX465411 | JX465395 | JX465377 | China       | 2010 |
| Lianghe      | LHEV/As-311     | <i>Anourosorex squamipes</i>  | JX465412 |          | JX465378 | China       | 2010 |
| Qiandao Lake | QDLV/YN05-284   | <i>Sorex cylindricauda</i>    | GU566023 | GU566022 | GU566021 | China       | 2005 |
| Seewis       | SWSV/mp70       | <i>Sorex araneus</i>          | EF636024 | EF636025 | EF636026 | Switzerland | 2006 |
| Seewis       | SWSV/MSB95480   | <i>Sorex araneus</i>          |          | GQ293139 | GQ293121 | Hungary     | 1997 |
| Seewis       | SWSV/Sd475      | <i>Sorex daphaenodon</i>      | GQ284573 |          | GQ267806 | Russia      | 2007 |
| Seewis       | SWSV/St489      | <i>Sorex tundrensis</i>       | GQ284574 |          | GQ267807 | Russia      | 2007 |
| Xinyi        | XYIV/MVZ180988  | <i>Anourosorex yamashinai</i> | KF705677 | KF705678 | KF705679 | Taiwan      | 1989 |
| Yakeshi      | YKSV/Yak-Si-210 | <i>Sorex isodon</i>           | JX465423 | JX465403 | JX465389 | China       | 2006 |

Soricomorpha: Soricidae: Crocidurinae

| Virus Name    | ID/Strain        | Host Scientific                | S        | M        | L        | Country       | Date |
|---------------|------------------|--------------------------------|----------|----------|----------|---------------|------|
| Azagny        | AZGV/KBM15       | <i>Crocidura obscurior</i>     | JF276226 | JF276227 | JF276228 | Cote d'Ivoire | 2009 |
| Bowé          | BOWV/VN1512      | <i>Crocidura douceti</i>       | KC631782 | KC631783 | KC631784 | Guinea        | 2012 |
| Imjin         | MJNV/CI04-55     | <i>Crocidura lasiura</i>       | EF641805 | EF641799 | EF641807 | Korea         | 2004 |
| Imjin         | MJNV/CI05-11     | <i>Crocidura lasiura</i>       | EF641804 | EF641798 | EF641806 | Korea         | 2005 |
| Jeju          | JJUV/SH42        | <i>Crocidura shantungensis</i> | HQ663933 | HQ663934 | HQ663935 | Korea         | 2007 |
| Jeju          | JJUV/10-11       | <i>Crocidura shantungensis</i> | HQ834695 | HQ834696 | HQ834697 | Korea         | 2010 |
| Tanganya      | TGNV/Tan826      | <i>Crocidura theresae</i>      |          |          | EF050454 | Guinea        | 2004 |
| Thottapalayam | TPMV/VRC66412    | <i>Suncus murinus</i>          | NC010704 | NC010708 | NC010707 | India         | 1964 |
| Thottapalayam | TPMV/LongwanSm53 | <i>Suncus murinus</i>          | JF784172 | JF784178 |          | China         | 2009 |

Soricomorpha: Soricidae: Myosoricinae

| Virus Name  | ID/Strain       | Host Scientific       | S        | M        | L        | Country  | Date |
|-------------|-----------------|-----------------------|----------|----------|----------|----------|------|
| Kilimanjaro | KMJV/FMNH174124 | <i>Myosorex zinki</i> | JX193698 | JX193699 | JX193700 | Tanzania | 2002 |
| Uluguru     | ULUV/FMNH158302 | <i>Myosorex geata</i> | JX193695 | JX193696 | JX193697 | Tanzania | 1996 |

Soricomorpha: Talpidae: Talpinae

| Virus Name | ID/Strain     | Host Scientific             | S        | M        | L        | Country       | Date |
|------------|---------------|-----------------------------|----------|----------|----------|---------------|------|
| Asama      | ASAV/H4       | <i>Urotrichus talpoides</i> | EU929070 | EU929073 | EU929076 | Japan         | 2008 |
| Asama      | ASAV/N9       | <i>Urotrichus talpoides</i> | EU929071 | EU929074 | EU929077 | Japan         | 2008 |
| Asama      | ASAV/N10      | <i>Urotrichus talpoides</i> | EU929072 | EU929075 | EU929078 | Japan         | 2008 |
| Nova       | NVAV/MSB95703 | <i>Talpa europaea</i>       | FJ539168 | HQ840957 | FJ593498 | Hungary       | 1999 |
| Nova       | NVAV/2086     | <i>Talpa europaea</i>       | KF515970 |          | JX990963 | Poland        | 2011 |
| Nova       | NVAV/2095     | <i>Talpa europaea</i>       | JX990929 |          | JX990954 | Poland        | 2011 |
| Nova       | NVAV/YA0067   | <i>Talpa europaea</i>       | KF010576 |          | KF010544 | France        | 2013 |
| Nova       | NVAV/YA0088   | <i>Talpa europaea</i>       | KF010570 |          | KF010533 | France        | 2013 |
| Oxbow      | OXBV/Ng1453   | <i>Neurotrichus gibbsii</i> | FJ539166 | FJ539167 | FJ593497 | United States | 2003 |

Soricomorpha: Talpidae: Scalopinae

| Virus Name | ID/Strain     | Host Scientific           | S        | M        | L        | Country       | Date |
|------------|---------------|---------------------------|----------|----------|----------|---------------|------|
| Rockport   | RKPV/MSB57411 | <i>Scalopus aquaticus</i> | HM015218 |          | HM015220 | United States | 1986 |
| Rockport   | RKPV/MSB57412 | <i>Scalopus aquaticus</i> | HM015223 | HM015219 | HM015221 | United States | 1986 |

Chiroptera: Vespertilionidae: Vespertilioninae

| Virus Name | ID/Strain  | Host Scientific             | S        | M | L        | Country       | Date |
|------------|------------|-----------------------------|----------|---|----------|---------------|------|
| Huangpi    | HUPV/Pa-1  | <i>Pipistrellus abramus</i> | JX473273 |   | JX465369 | China         | 2012 |
| Mouyassué  | MOYV/KB576 | <i>Neoromicia nanus</i>     |          |   | JQ287716 | Cote d'Ivoire | 2011 |

Chiroptera: Nycteridae

| Virus Name | ID/Strain | Host Scientific         | S | M | L        | Country      | Date |
|------------|-----------|-------------------------|---|---|----------|--------------|------|
| Magboi     | MGBV/1209 | <i>Nycteris hispida</i> |   |   | JN037851 | Sierra Leone | 2009 |

Chiroptera: Rhinolophidae

| Virus Name | ID/Strain   | Host Scientific              | S        | M        | L        | Country | Date |
|------------|-------------|------------------------------|----------|----------|----------|---------|------|
| Longquan   | LQUV/Ra-10  | <i>Rhinolophus affinis</i>   | JX465413 | JX465396 | JX465379 | China   | 2011 |
| Longquan   | LQUV/Ra-14  | <i>Rhinolophus affinis</i>   | JX465414 |          | JX465380 | China   | 2011 |
| Longquan   | LQUV/Ra-25  | <i>Rhinolophus affinis</i>   | JX465415 | JX465397 | JX465381 | China   | 2011 |
| Longquan   | LQUV/Ra-5   | <i>Rhinolophus affinis</i>   | JX465416 | JX465398 | JX465382 | China   | 2011 |
| Longquan   | LQUV/Ra-56  | <i>Rhinolophus affinis</i>   | JX465417 | JX465399 | JX465383 | China   | 2011 |
| Longquan   | LQUV/Ra-90  | <i>Rhinolophus affinis</i>   | JX465418 | JX465400 | JX465384 | China   | 2011 |
| Longquan   | LQUV/Rm-180 | <i>Rhinolophus monoceros</i> | JX465419 |          | JX465385 | China   | 2011 |
| Longquan   | LQUV/Rs-141 | <i>Rhinolophus sinicus</i>   | JX465420 |          | JX465386 | China   | 2011 |
| Longquan   | LQUV/Rs-168 | <i>Rhinolophus sinicus</i>   | JX465421 | JX465401 | JX465387 | China   | 2011 |
| Longquan   | LQUV/Rs-32  | <i>Rhinolophus sinicus</i>   | JX465422 | JX465402 | JX465388 | China   | 2011 |

Chiroptera: Hipposideridae

| Virus Name | ID/Strain    | Host Scientific            | S        | M        | L        | Country  | Date |
|------------|--------------|----------------------------|----------|----------|----------|----------|------|
| Xuan Son   | XSV/F42682   | <i>Hipposideros pomona</i> | KF704709 | KJ000538 | KF704714 | Viet Nam | 1997 |
| Xuan Son   | XSV/F44601   | <i>Hipposideros pomona</i> | KF704712 | KJ000539 | KF704717 | Viet Nam | 1999 |
| Xuan Son   | XSV/VN1982B4 | <i>Hipposideros pomona</i> | KC688335 |          | JX912953 | Viet Nam | 2012 |

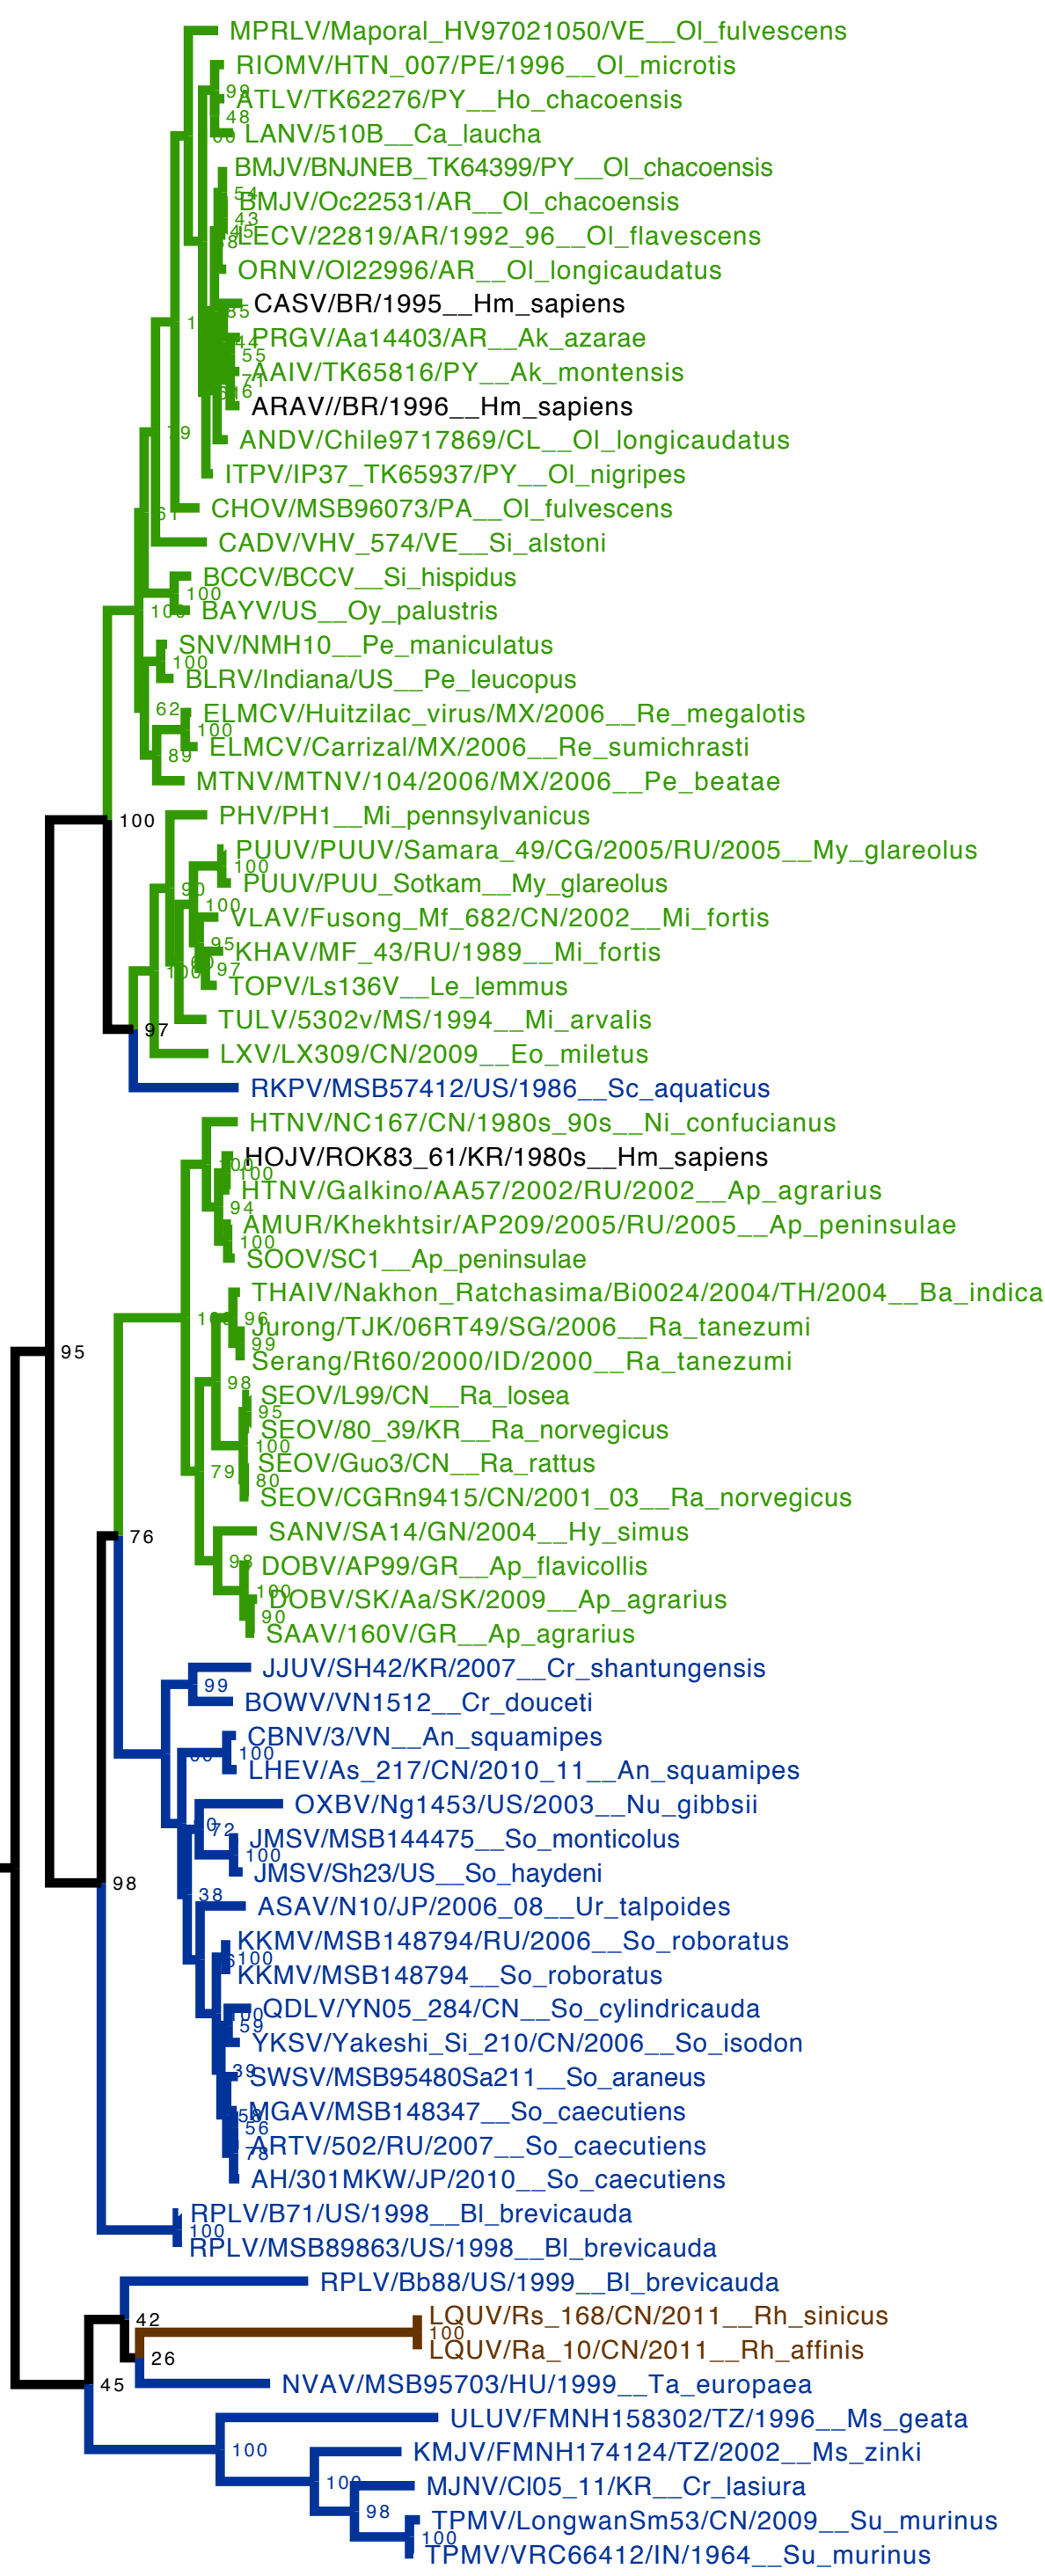

Bunyamwera

0.6 substitutions per site
